# Supplementary material for: A concise one-pot synthesis of trifluoromethyl-containing 2,6-disubstituted 5,6,7,8-tetrahydroquinolines and 5,6,7,8-tetrahydronaphthyridines
Source: Royal Society of Chemistry journal article supplement (doi:10.1039/c2ob27113c), 2013-01-01
Supplement: c2ob27113c.pdf [file c2ob27113c.pdf]

## Supplemental Information

### A concise one-pot synthesis of trifluoromethyl-containing 2,6- disubstituted 5,6,7,8-tetrahydroquinolines and 5,6,7,8-tetrahydronaphthyridines

Russell J. Johnson, Donogh J. R. O'Mahony,\* William T. Edwards and Matthew A. J. Dunton\*

| <b>Contents</b>                                                                       | <b>Page</b> |
|---------------------------------------------------------------------------------------|-------------|
| <sup>1</sup> H and <sup>19</sup> F NMR data for compound <b>6</b>                     | S2          |
| <sup>13</sup> C NMR data for compound <b>6</b>                                        | S3          |
| <sup>1</sup> H and <sup>19</sup> F NMR data for compound <b>11</b>                    | S4          |
| <sup>13</sup> C NMR data for compound <b>11</b>                                       | S5          |
| <sup>1</sup> H NMR data for compound <b>12</b>                                        | S6          |
| <sup>1</sup> H NMR data for compound <b>13</b>                                        | S7          |
| <sup>1</sup> H NMR data for compound <b>15</b>                                        | S8          |
| <sup>13</sup> C NMR data for compound <b>15</b>                                       | S9          |
| <sup>1</sup> H NMR data for compound <b>16</b>                                        | S10         |
| <sup>1</sup> H NMR data for compound <b>19</b>                                        | S11         |
| <sup>1</sup> H NMR data for compound <b>20</b>                                        | S12         |
| <sup>1</sup> H and <sup>19</sup> F NMR data for compound <b>21</b>                    | S13         |
| <sup>13</sup> C NMR data for compound <b>21</b>                                       | S14         |
| <sup>1</sup> H and <sup>19</sup> F NMR data for compound <b>22</b>                    | S15         |
| <sup>13</sup> C NMR data for compound <b>22</b>                                       | S16         |
| <sup>1</sup> H and <sup>19</sup> F NMR data for compound <b>23</b>                    | S17         |
| <sup>13</sup> C NMR data for compound <b>23</b>                                       | S18         |
| <sup>1</sup> H NMR data for compound <b>24</b>                                        | S19         |
| <sup>1</sup> H NMR data for Weinreb amide intermediate used in synthesis of <b>24</b> | S20         |
| <sup>1</sup> H NMR data for compound <b>25</b>                                        | S21         |
| <sup>13</sup> C NMR data for compound <b>25</b>                                       | S22         |
| <sup>1</sup> H and <sup>19</sup> F NMR data for compound <b>26</b>                    | S23         |
| <sup>13</sup> C NMR data for compound <b>26</b>                                       | S24         |
| <sup>1</sup> H and <sup>19</sup> F NMR data for compound <b>29</b>                    | S25         |
| <sup>13</sup> C NMR data for compound <b>29</b>                                       | S26         |
| <sup>1</sup> H NMR data for compound <b>30</b>                                        | S27         |

$^1\text{H}$  and  $^{19}\text{F}$  NMR for compound **6**

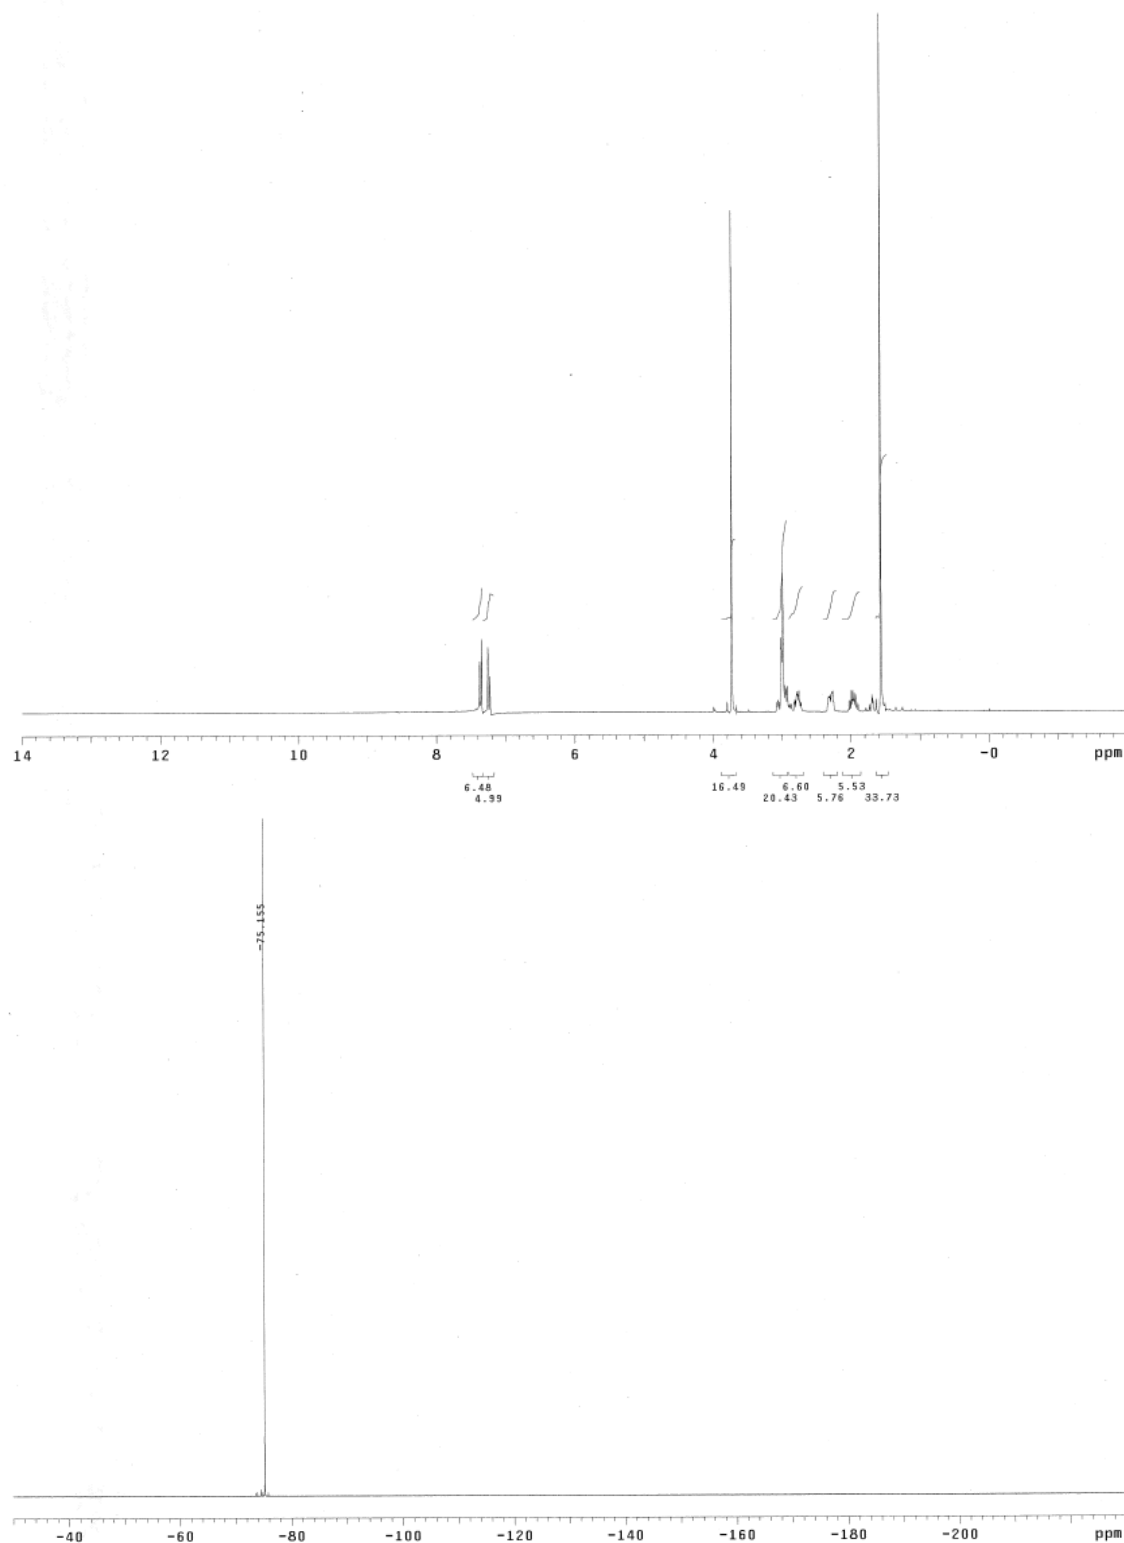

<sup>13</sup>C for compound 6

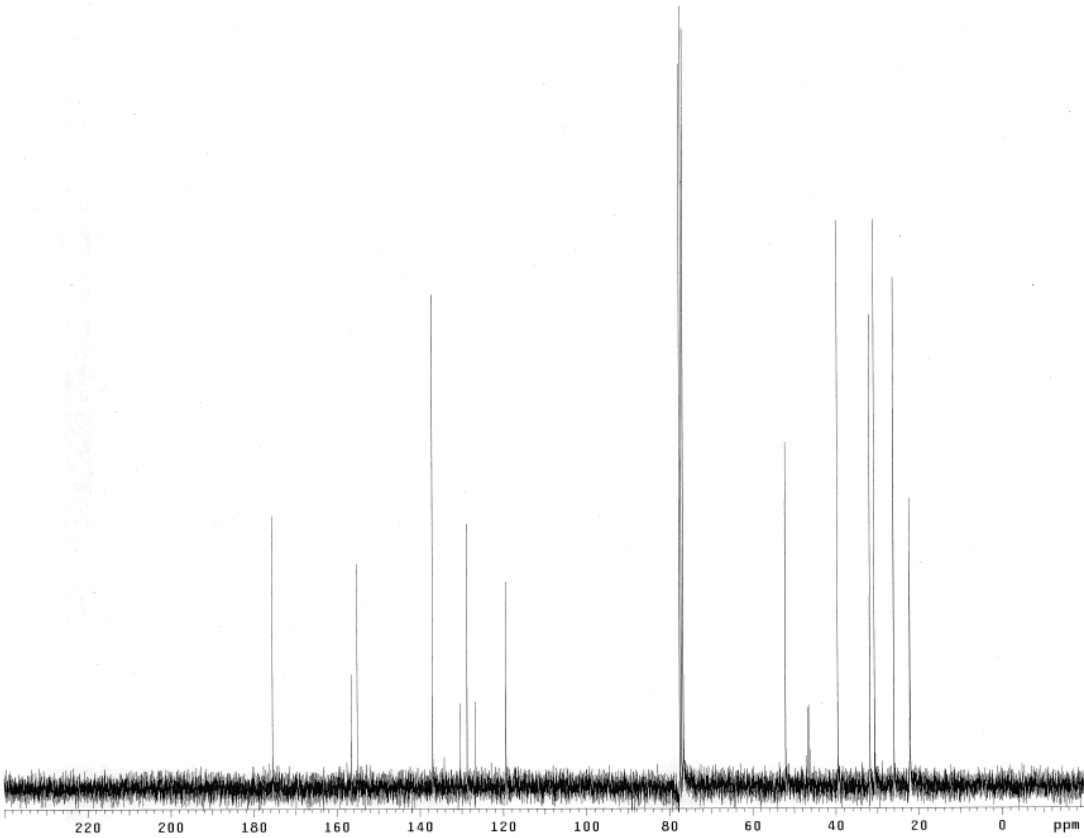

$^1\text{H}$  and  $^{19}\text{F}$  NMR for compound **11**

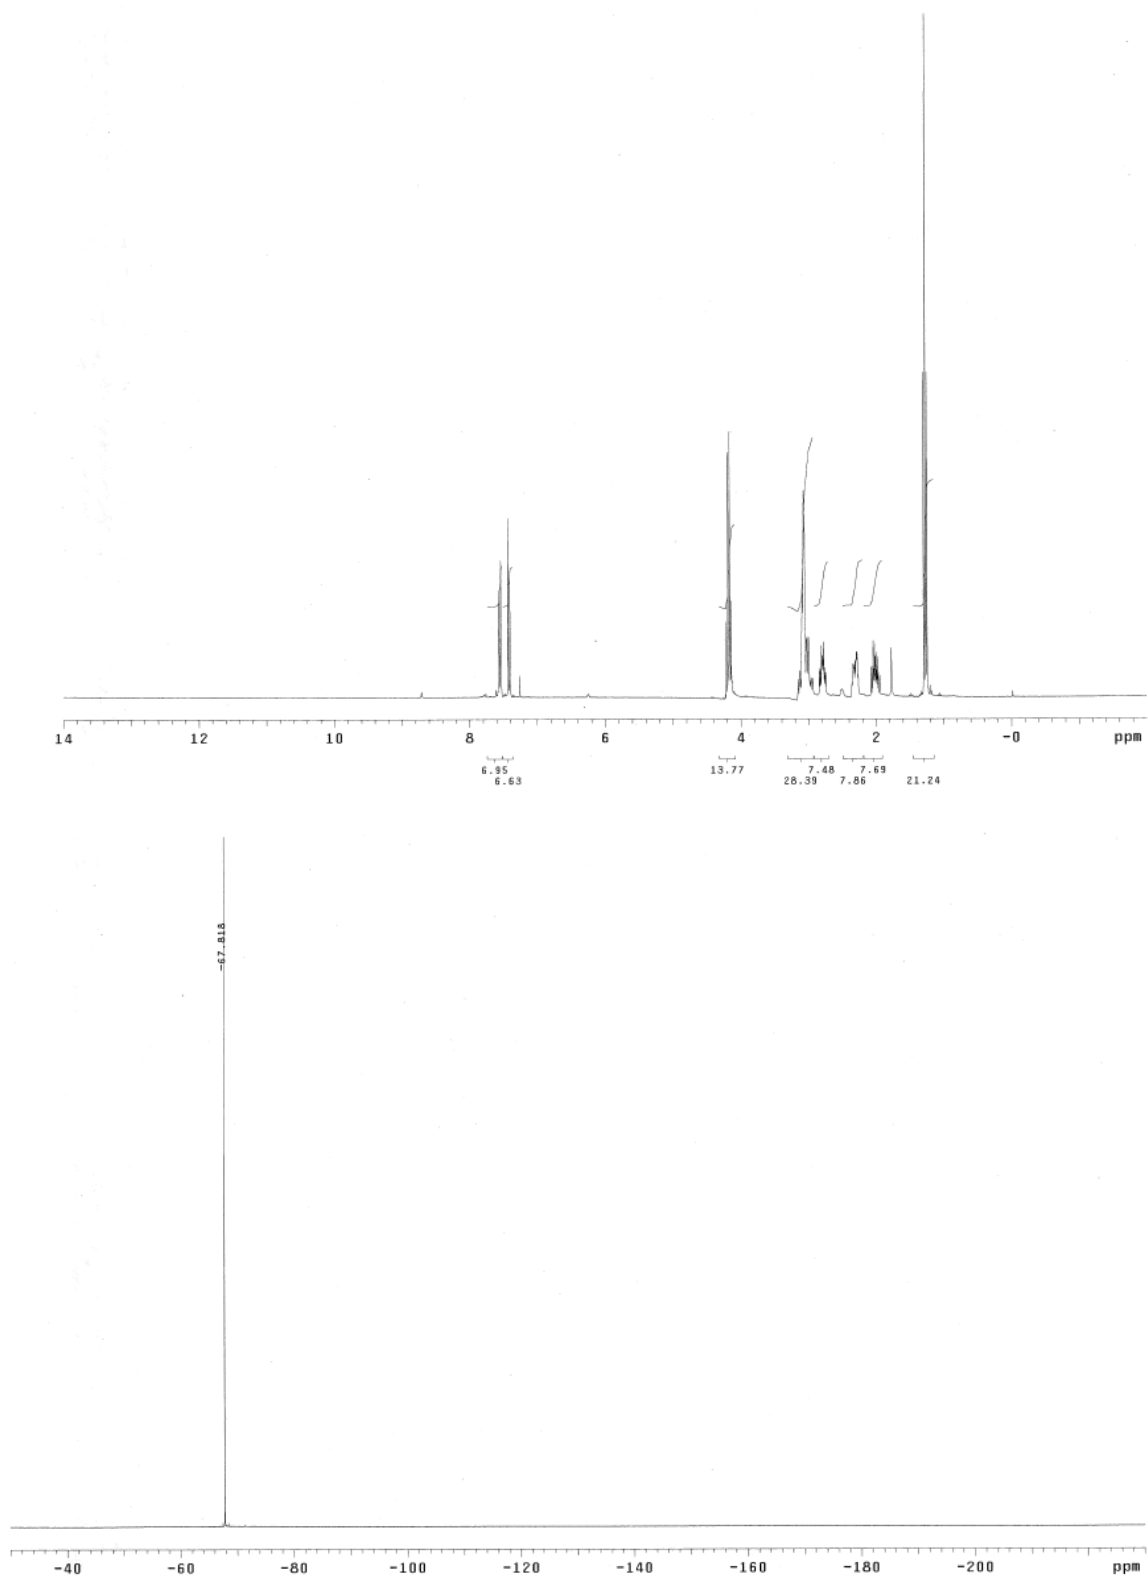

$^{13}\text{C}$  NMR for compound **11**

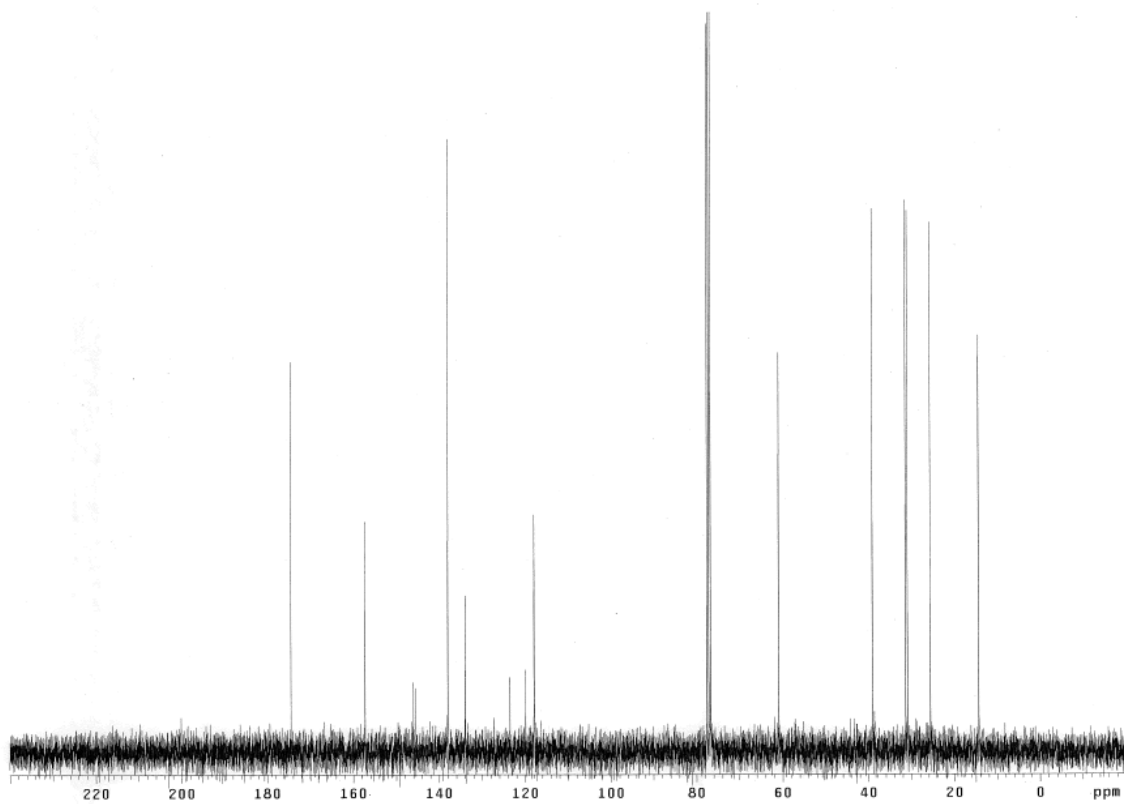

<sup>1</sup>H NMR for compound **12**<sup>1</sup>

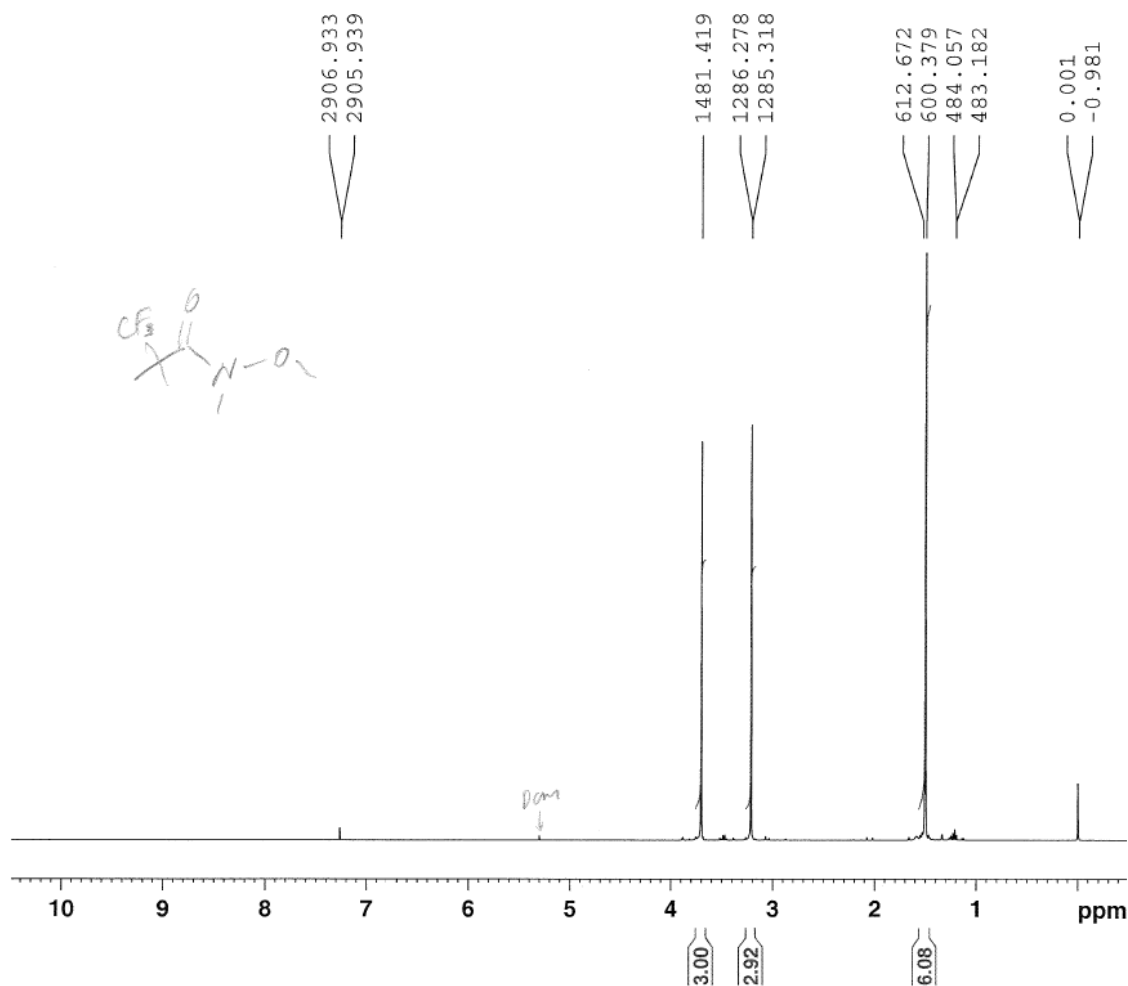

- 1 For a preparation of 3,3,3-Trifluoro-*N*-methoxy *N*-methyl 2,2-dimethylpropanamide **12** see (a) E. Canales, L. S. Chong, M. Clarke, H. O'Neil, E. Doerffler, S. E. Lazerwith, W. Lew, Q. Liu, M. Mertzman, P. A. Morgnelli, W. J. Watkins and H. Ye, Patent WO2011011303 (2011); *Chem. Abstr.*, 2011, **154**, p. 207646. (b) R. T. Hendricks, J. T. Hermann, S. Jaime-Figueroa, R. K. Kondru, Y. Lou, S. M. Lynch, T. D. Owens, M. Soth and C. W. Yee, Patent WO201144585 (2011); *Chem. Abstr.*, 2011, **155**, p. 683790. This compound is also commercially-available.

<sup>1</sup>H NMR for compound **13**<sup>2</sup>

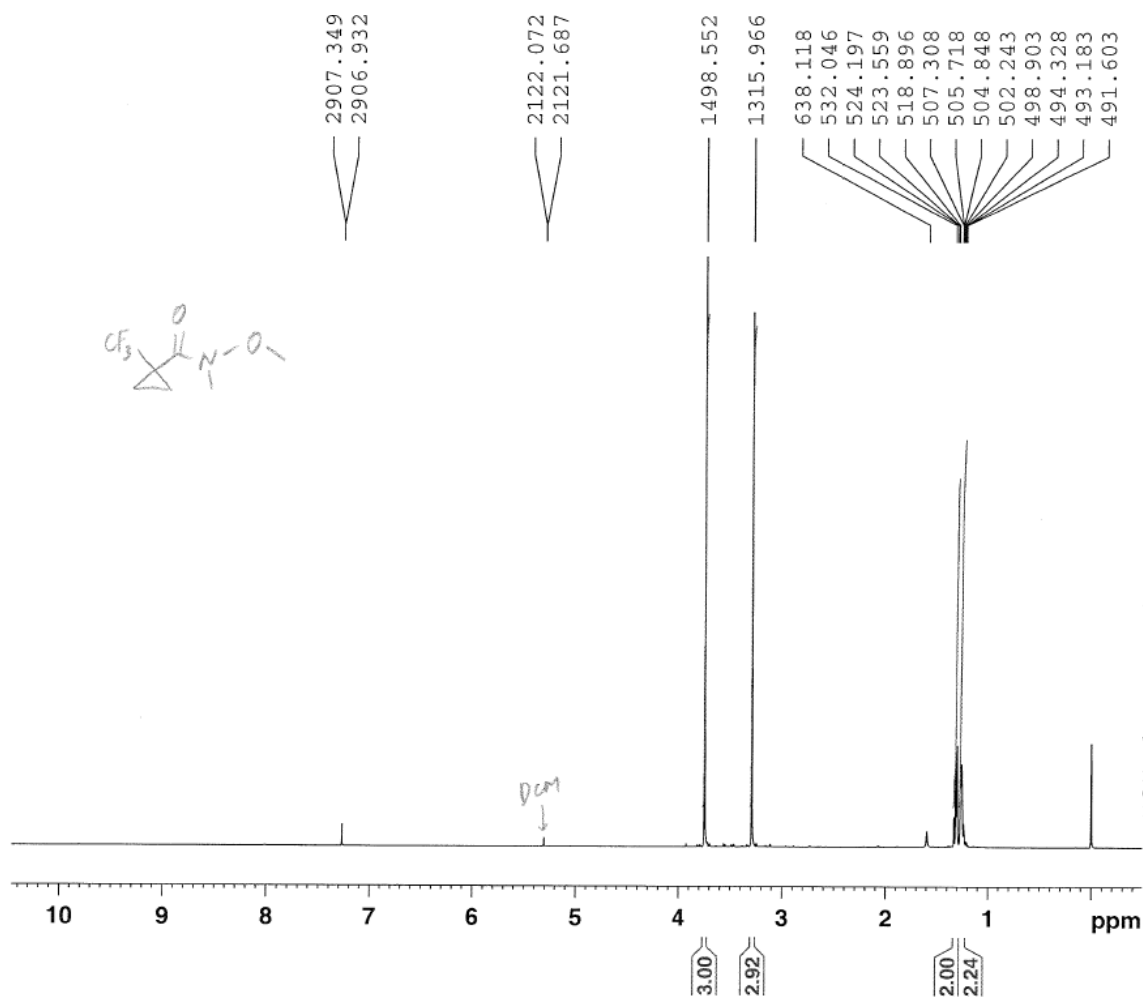

- 2 For a preparation of *N*-methoxy-*N*-methyl-1-(trifluoromethyl)cyclopropane carboxamide **13** see J. T. Kuethe, K. G. Childers, Z. Peng, M. Journet, G. R. Humphrey, T. Vickery, D. Bachert and T. T. Lam, *Org. Proc. Res. Develop.*, 2009, **13**, 576. This compound is also commercially-available.

<sup>1</sup>H NMR for compound **15**

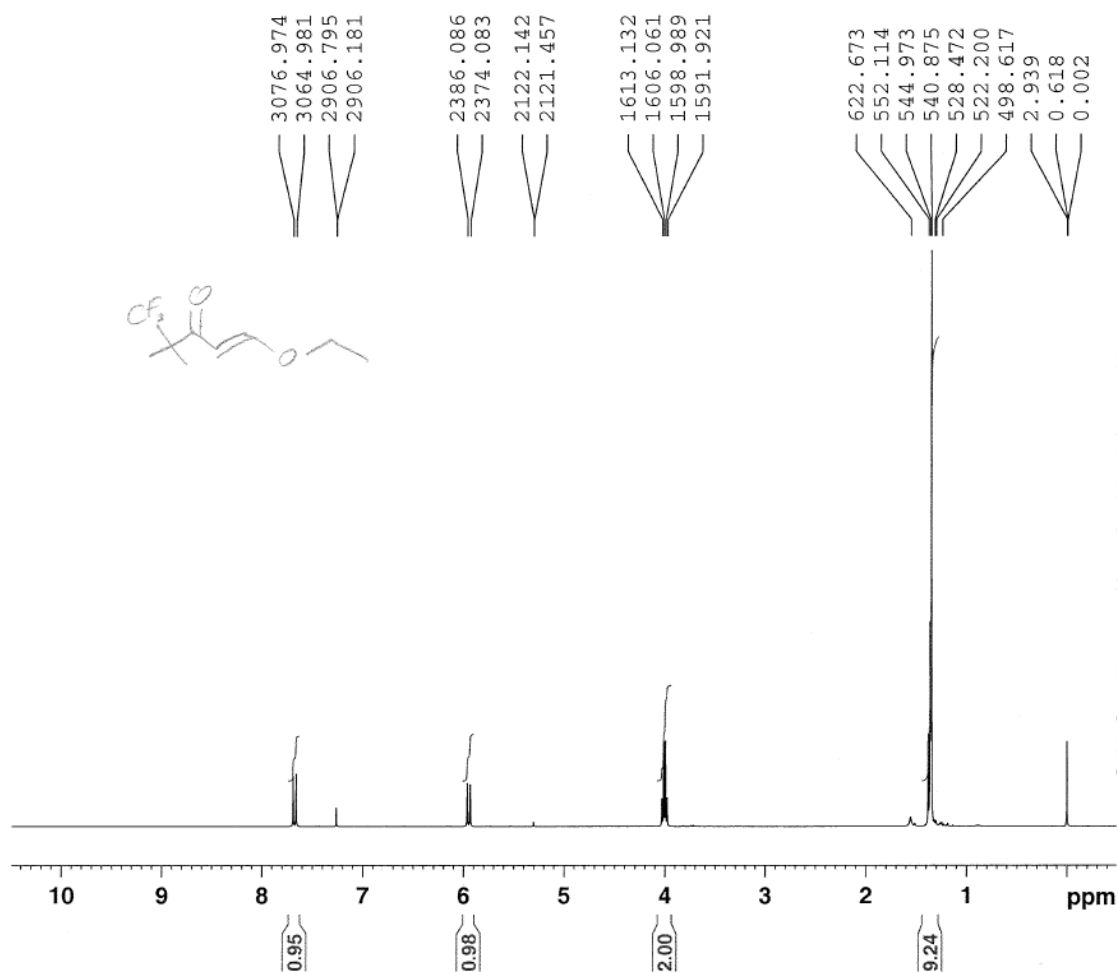



<sup>13</sup>C NMR for compound **15**

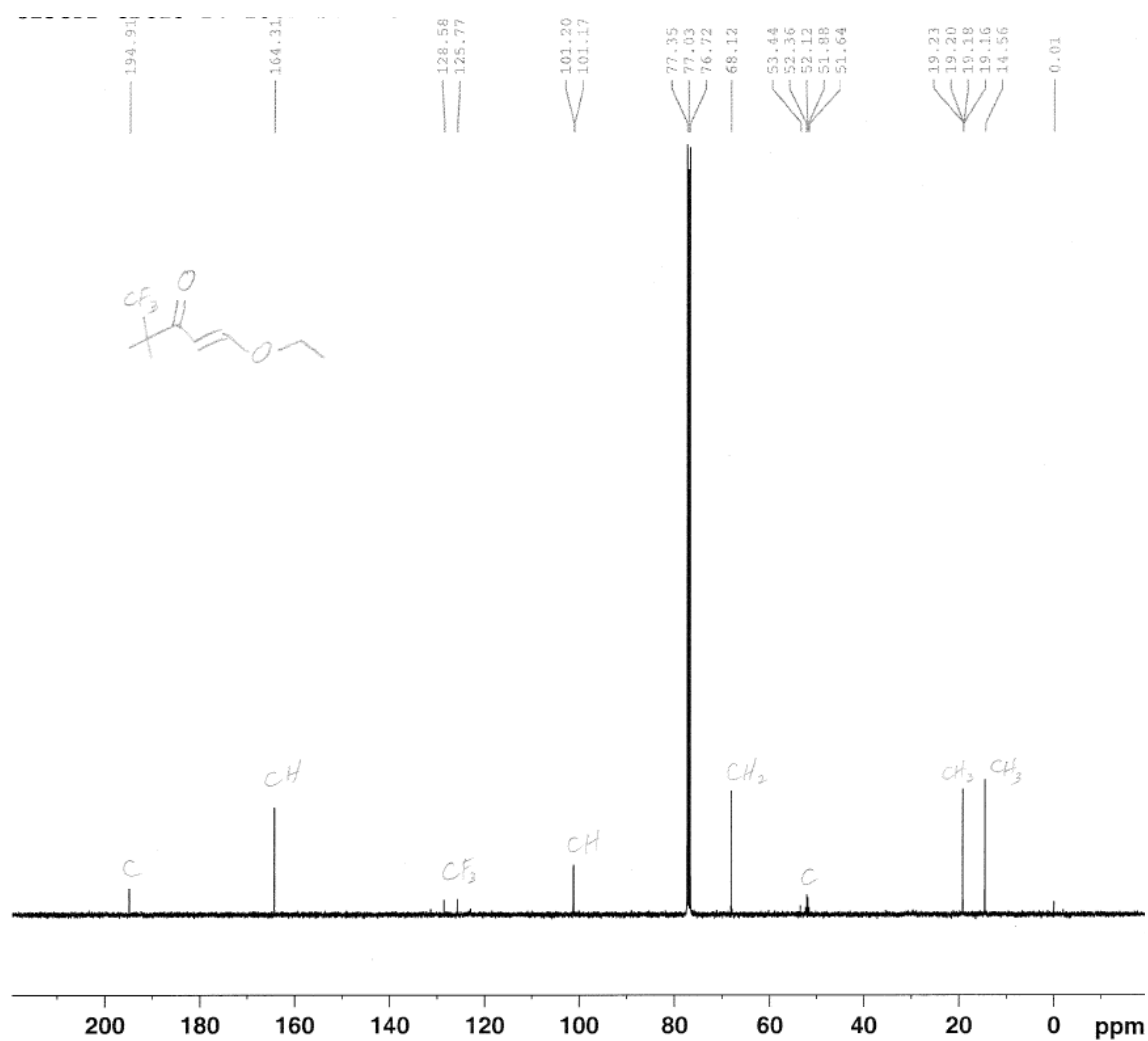

<sup>1</sup>H NMR for compound **16**

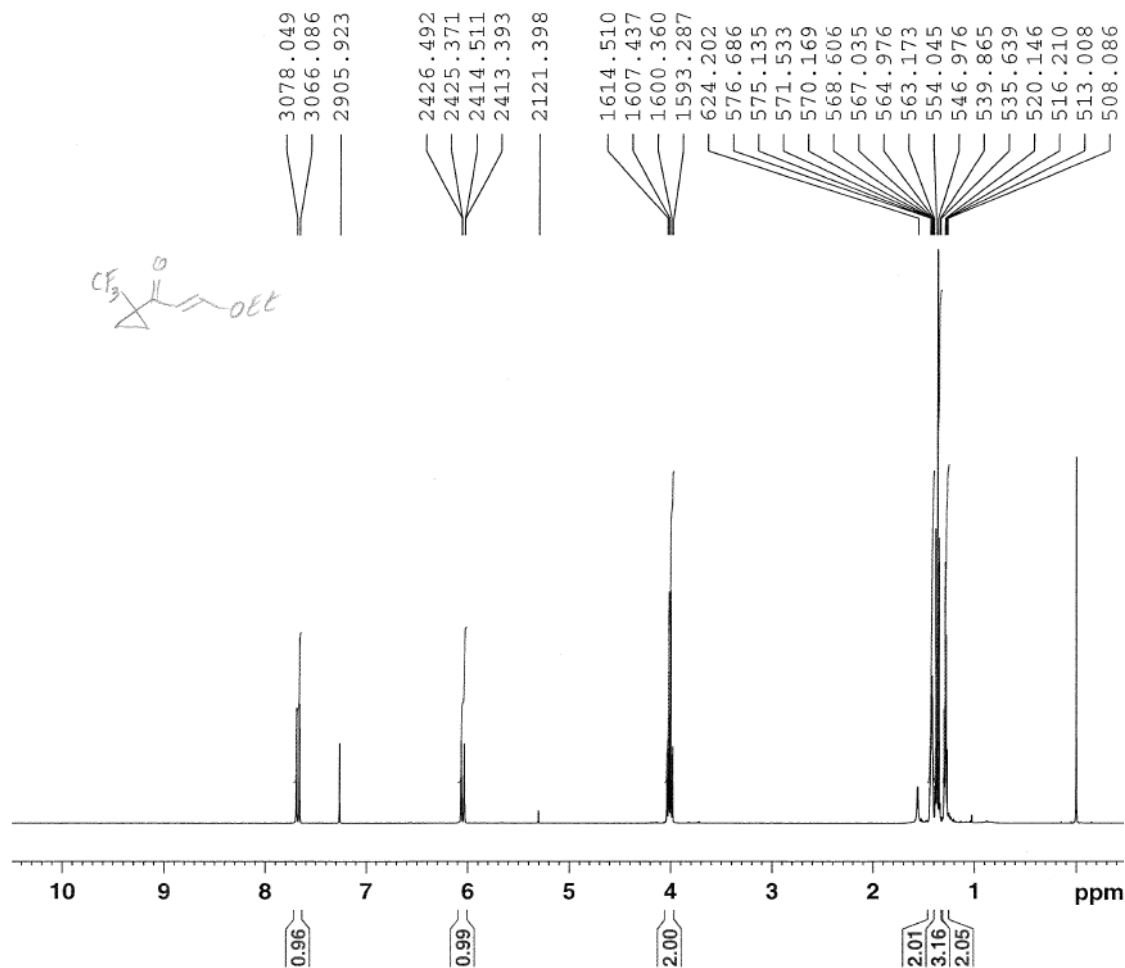

<sup>1</sup>H NMR for compound **19**

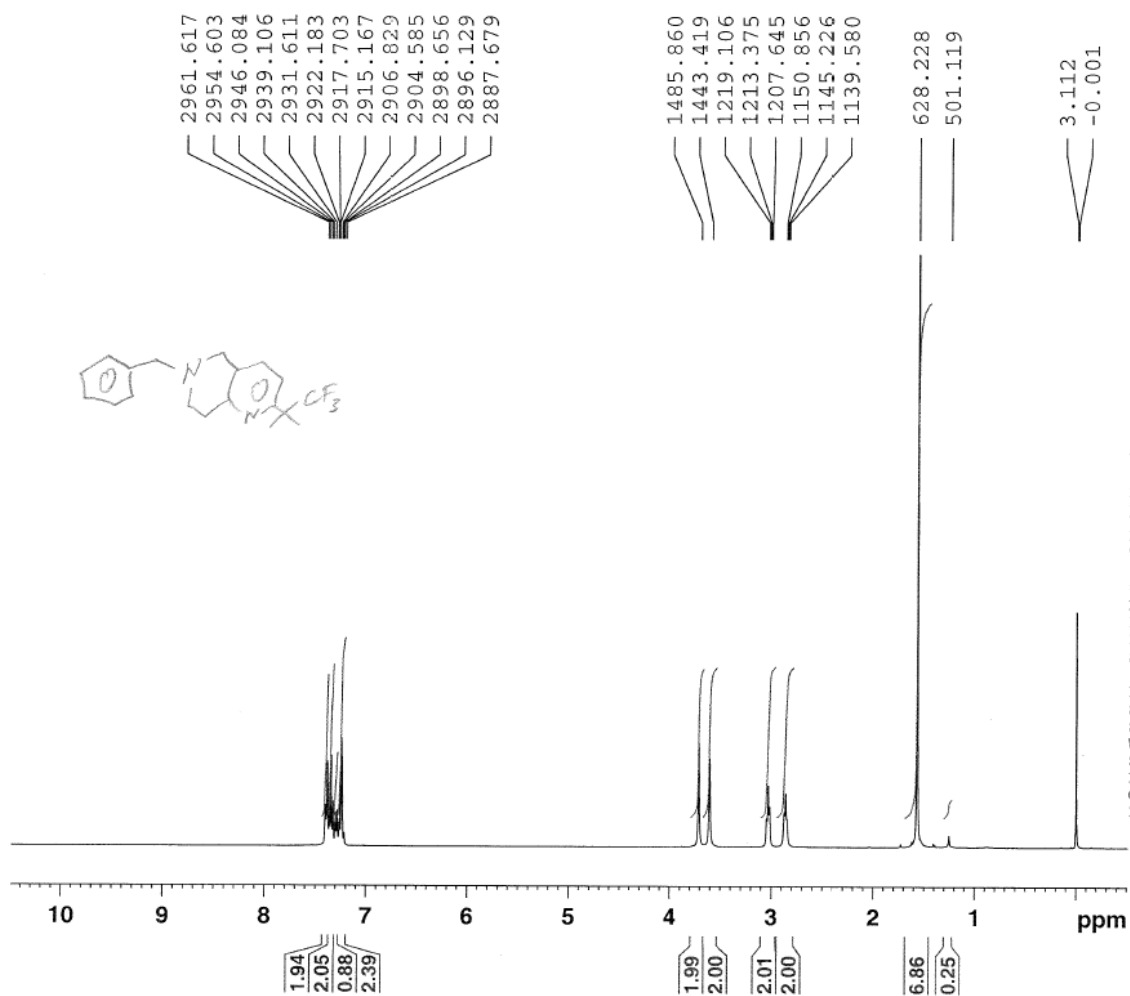



<sup>1</sup>H and <sup>19</sup>F NMR for compound **21**

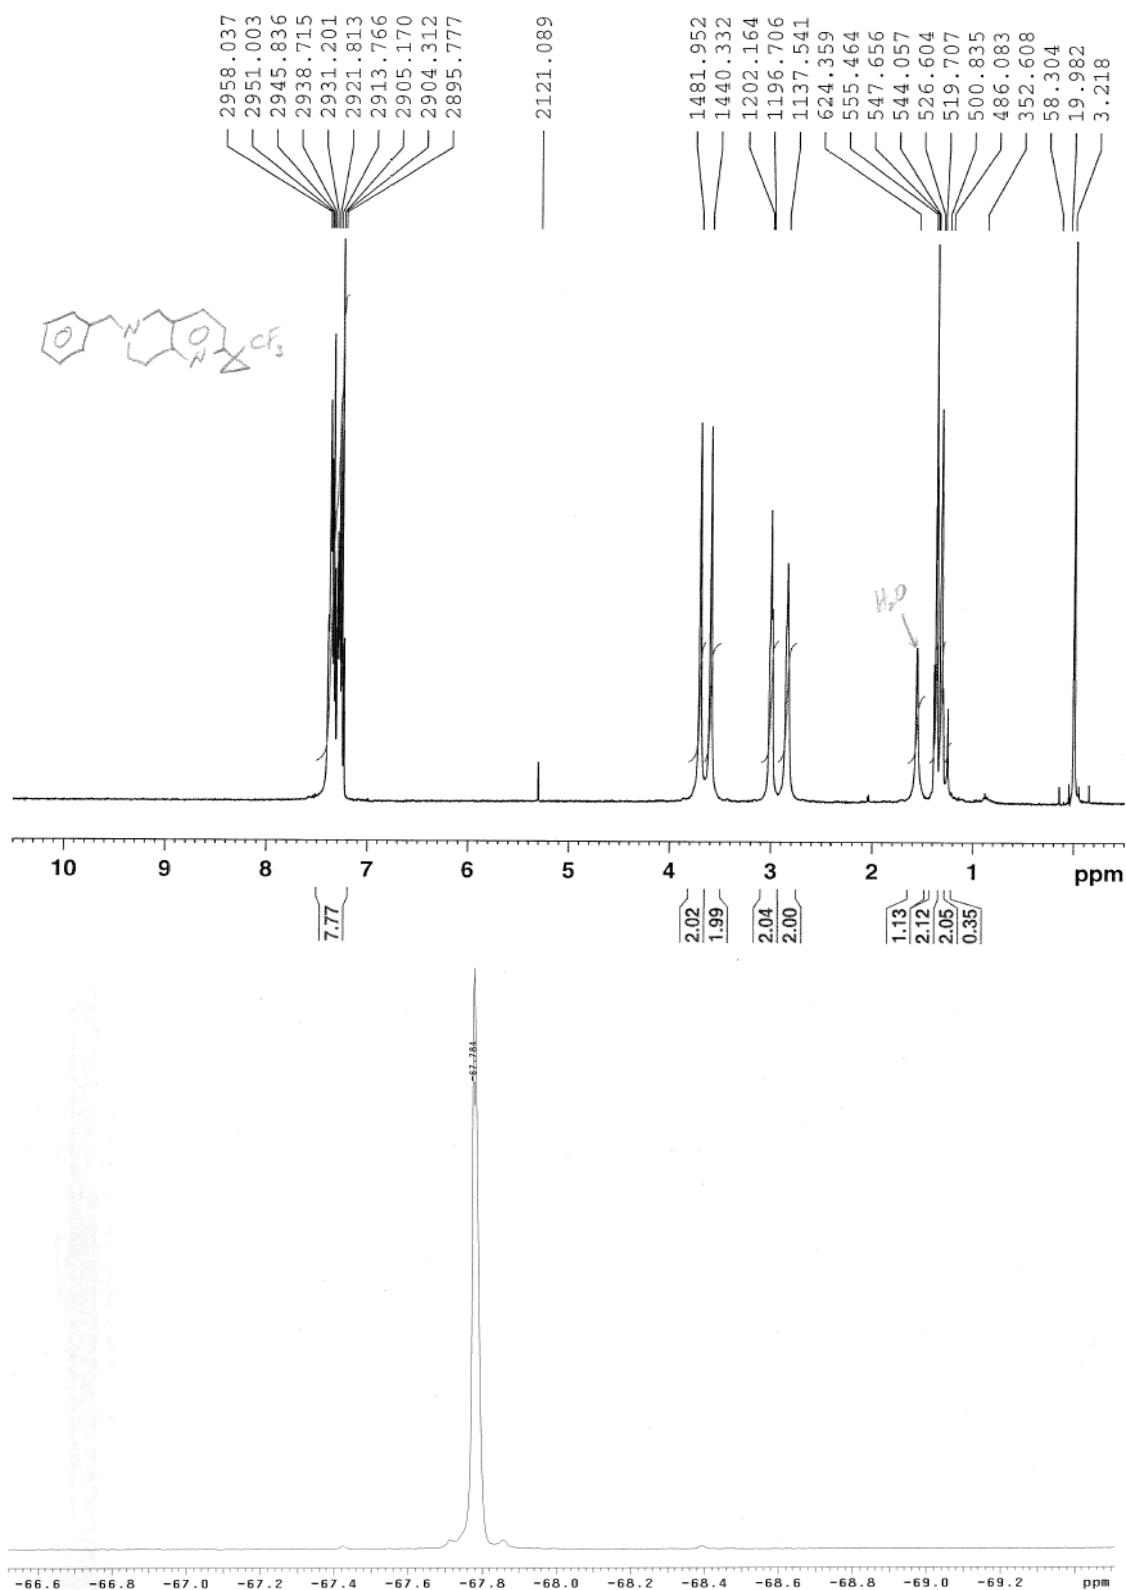

$^{13}\text{C}$  NMR for compound **21**

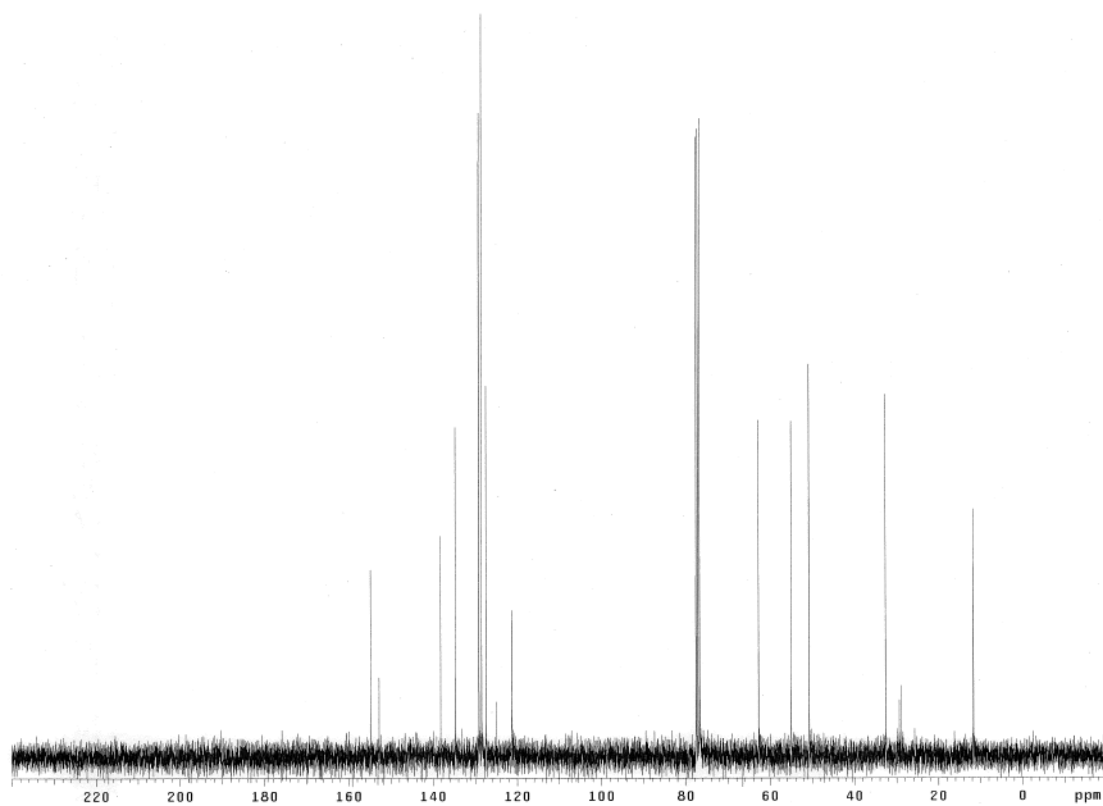

<sup>1</sup>H NMR for compound **22**

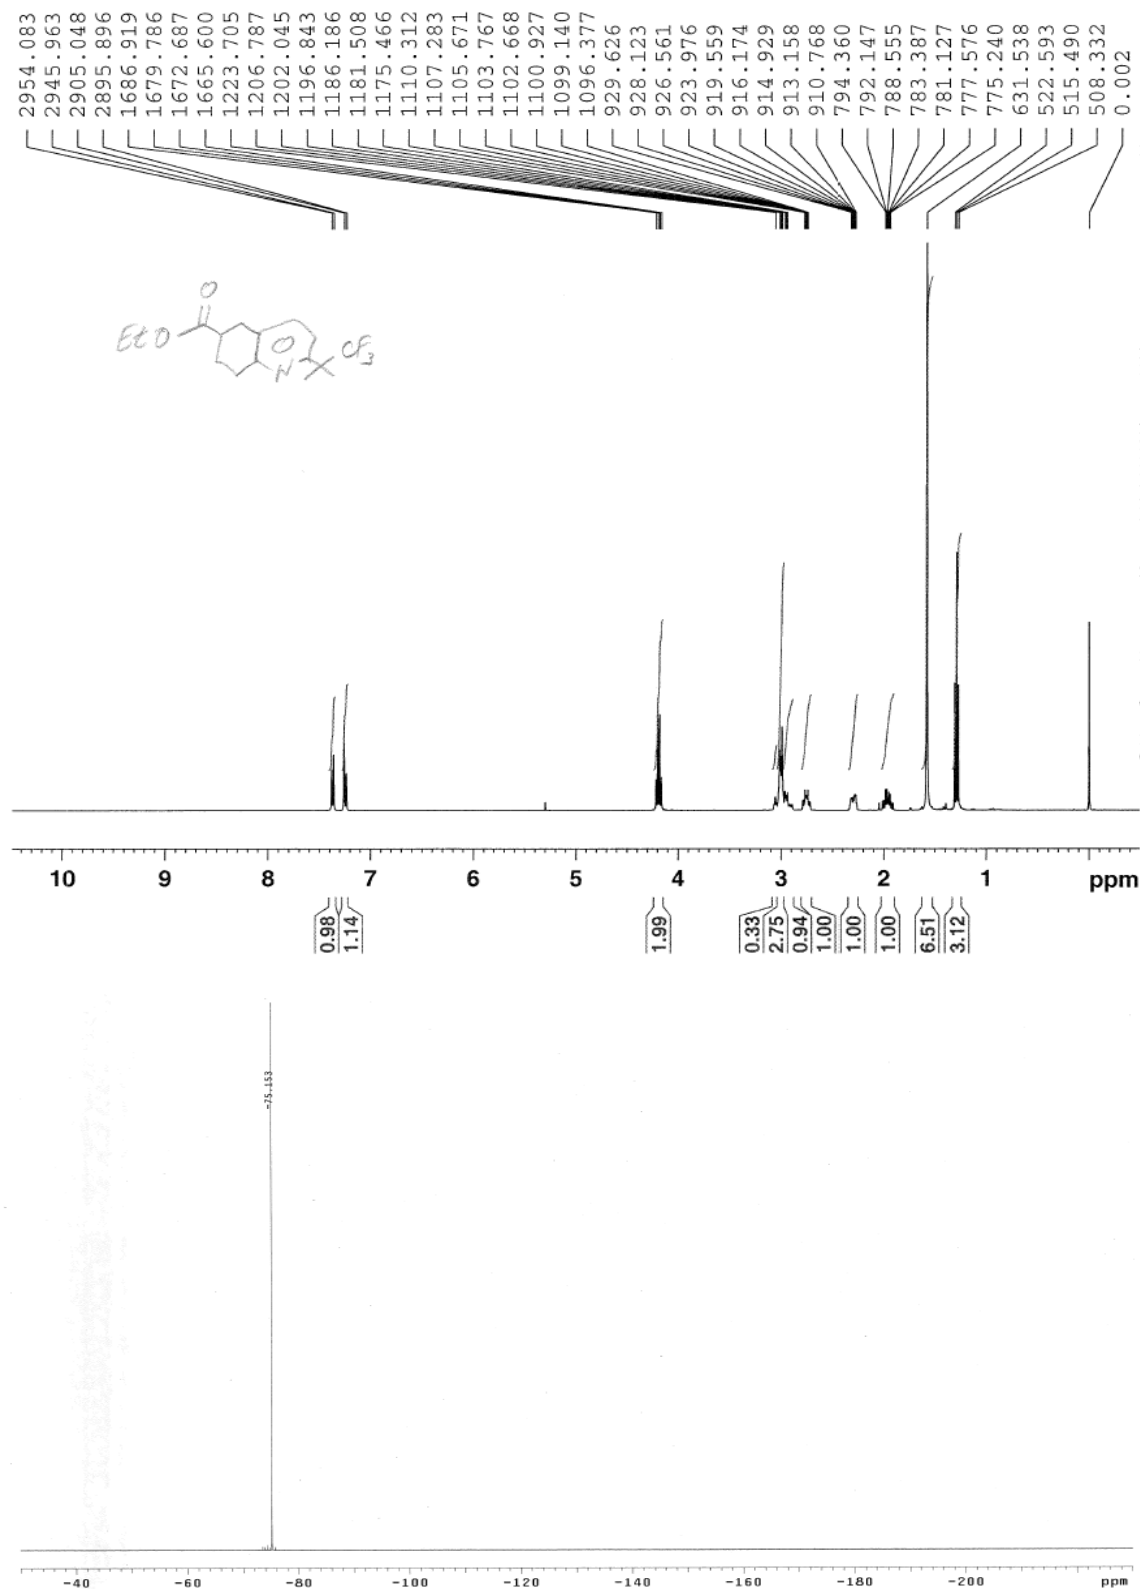

<sup>13</sup>C NMR for compound **22**

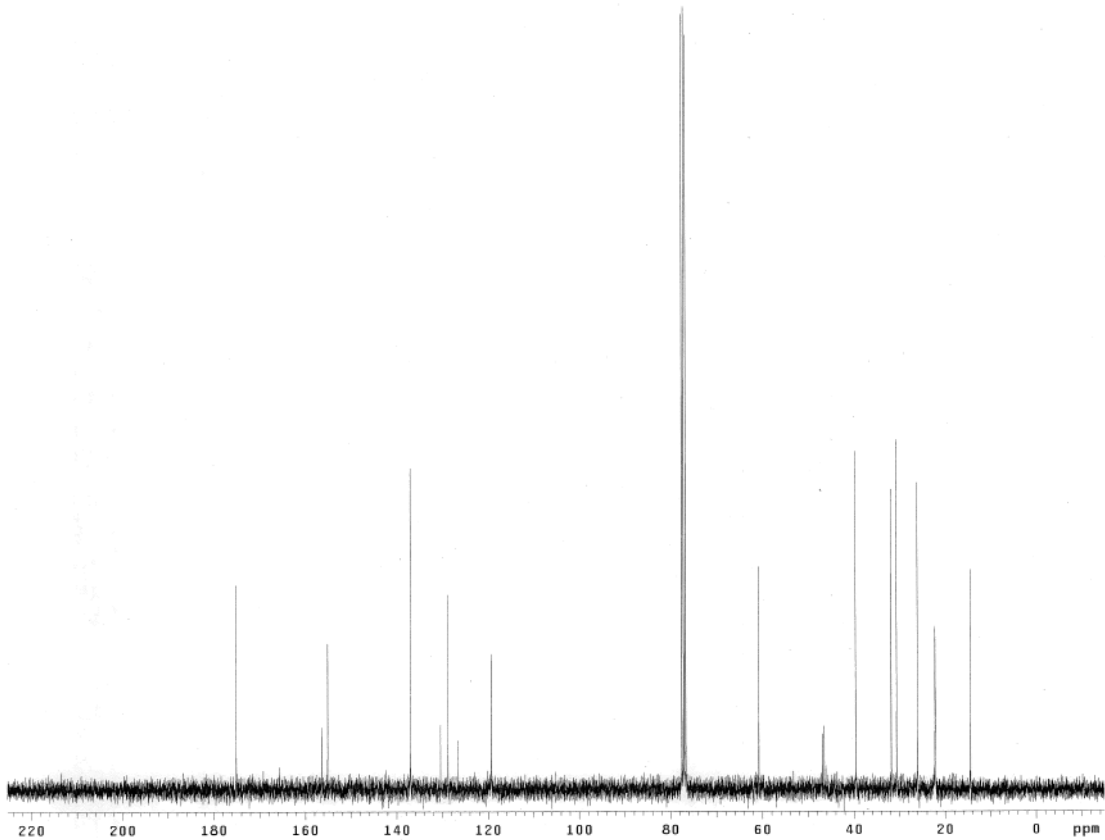



<sup>1</sup>H NMR for compound **23**

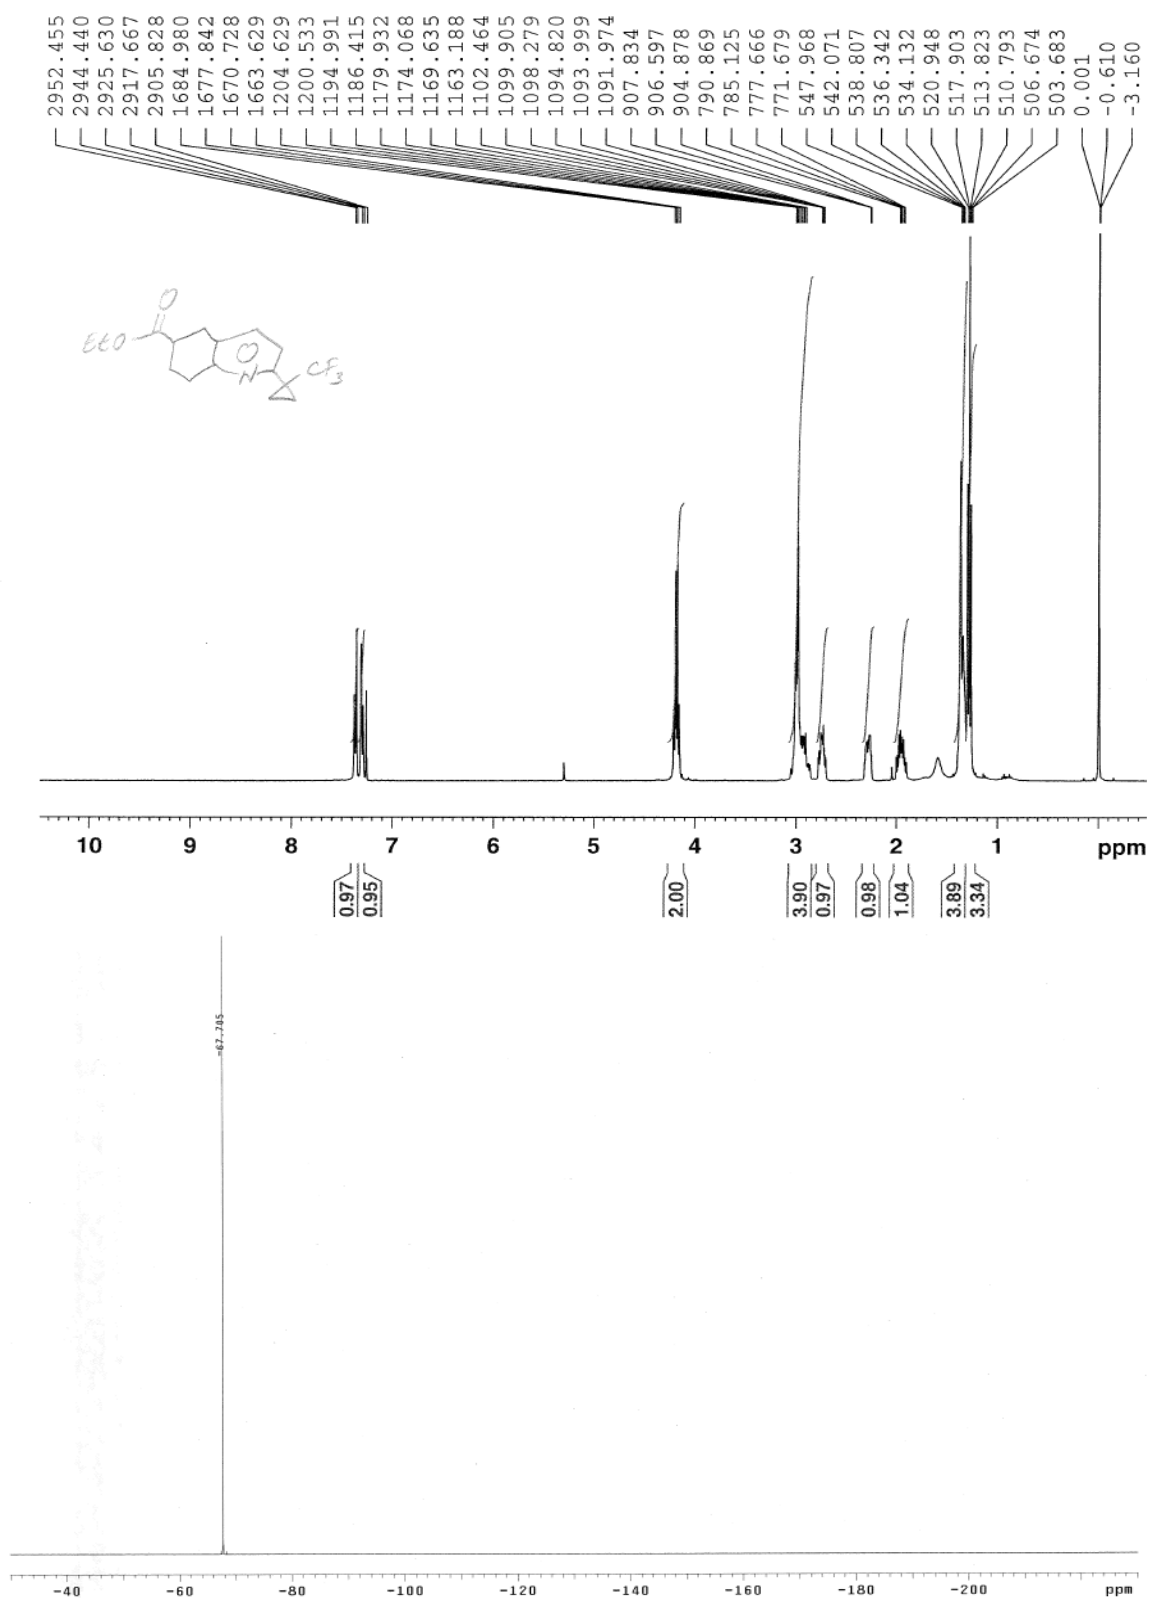

$^{13}\text{C}$  NMR for compound **23**

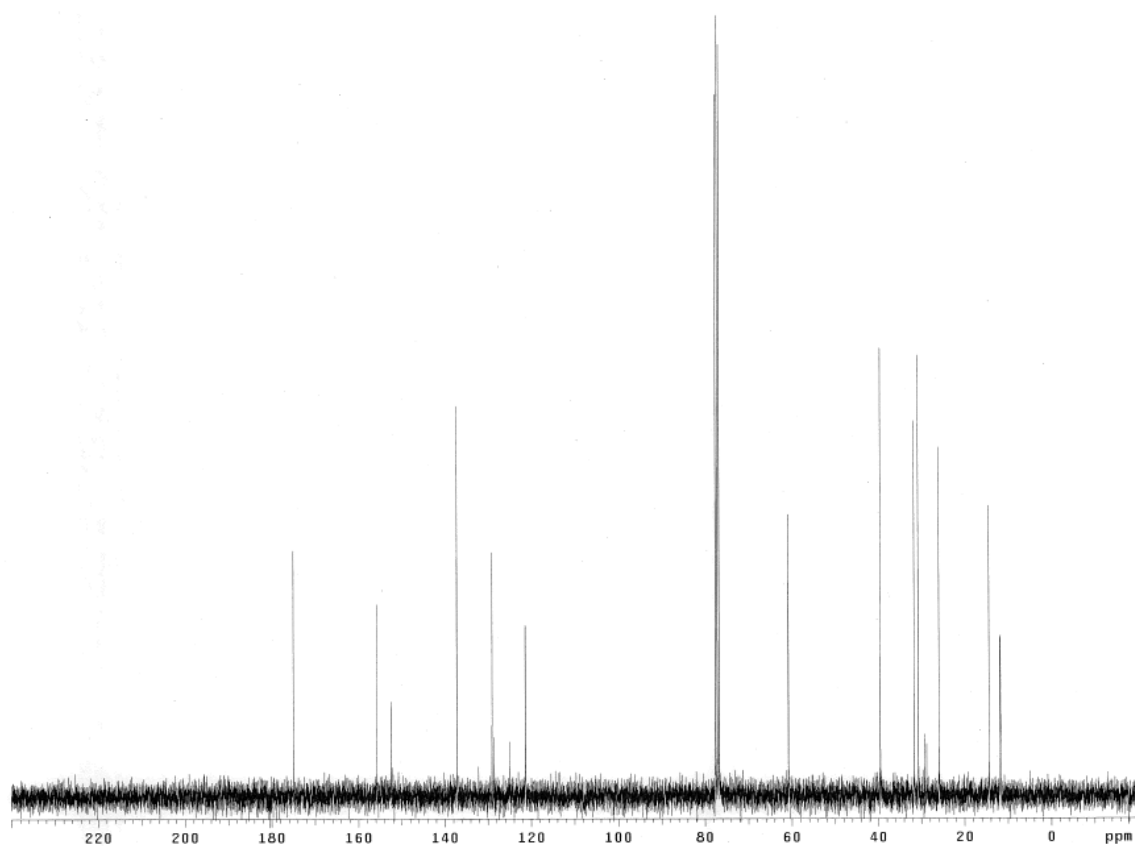

<sup>1</sup>H NMR for compound **24**<sup>4</sup>

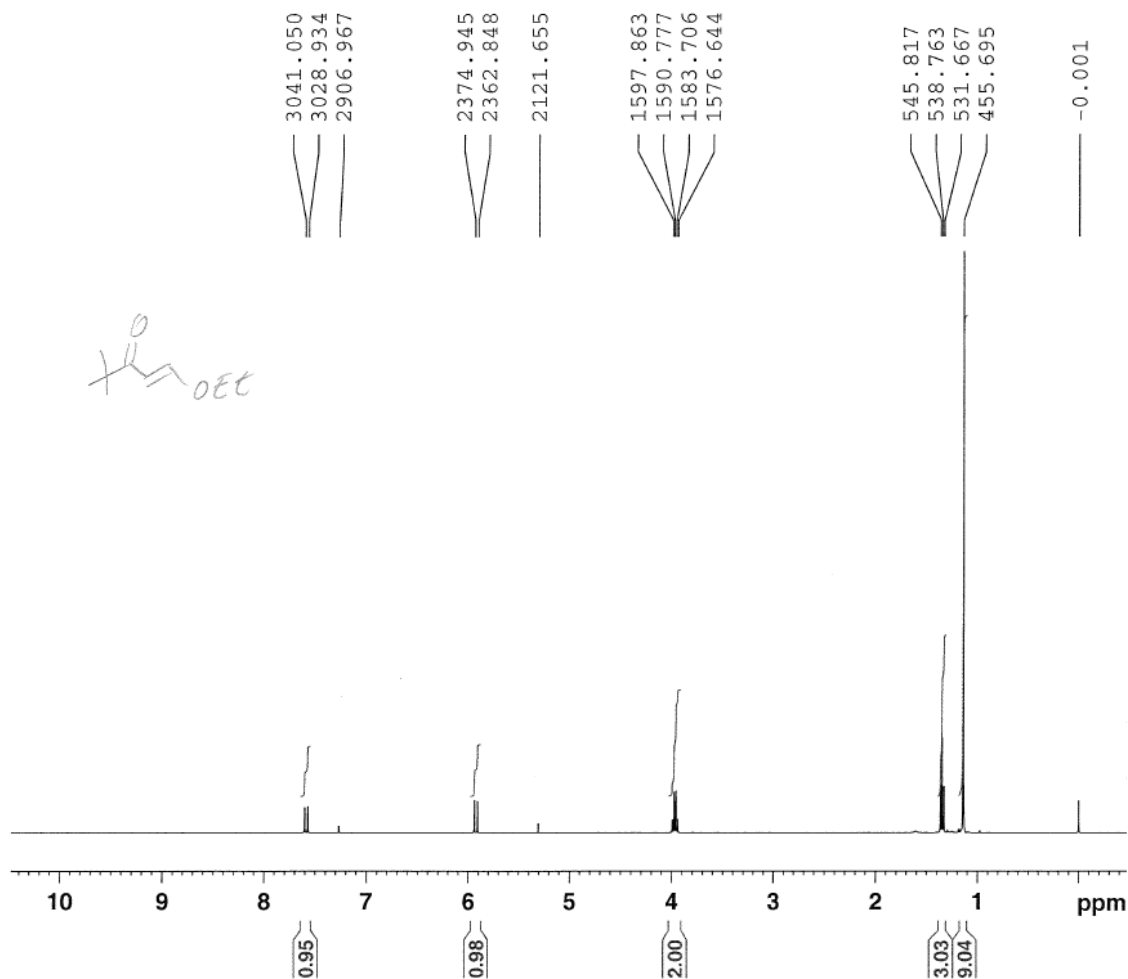

- 4 For a preparation of (*E*)-1-ethoxy-4,4-dimethyl-1-penten-3-one **24** see P. Martinson, *Acta Chem. Scand.*, 1969, **23**, 751. This compound is also commercially-available.

<sup>1</sup>H NMR for intermediate Weinreb amide used for synthesis of **24**<sup>5</sup>

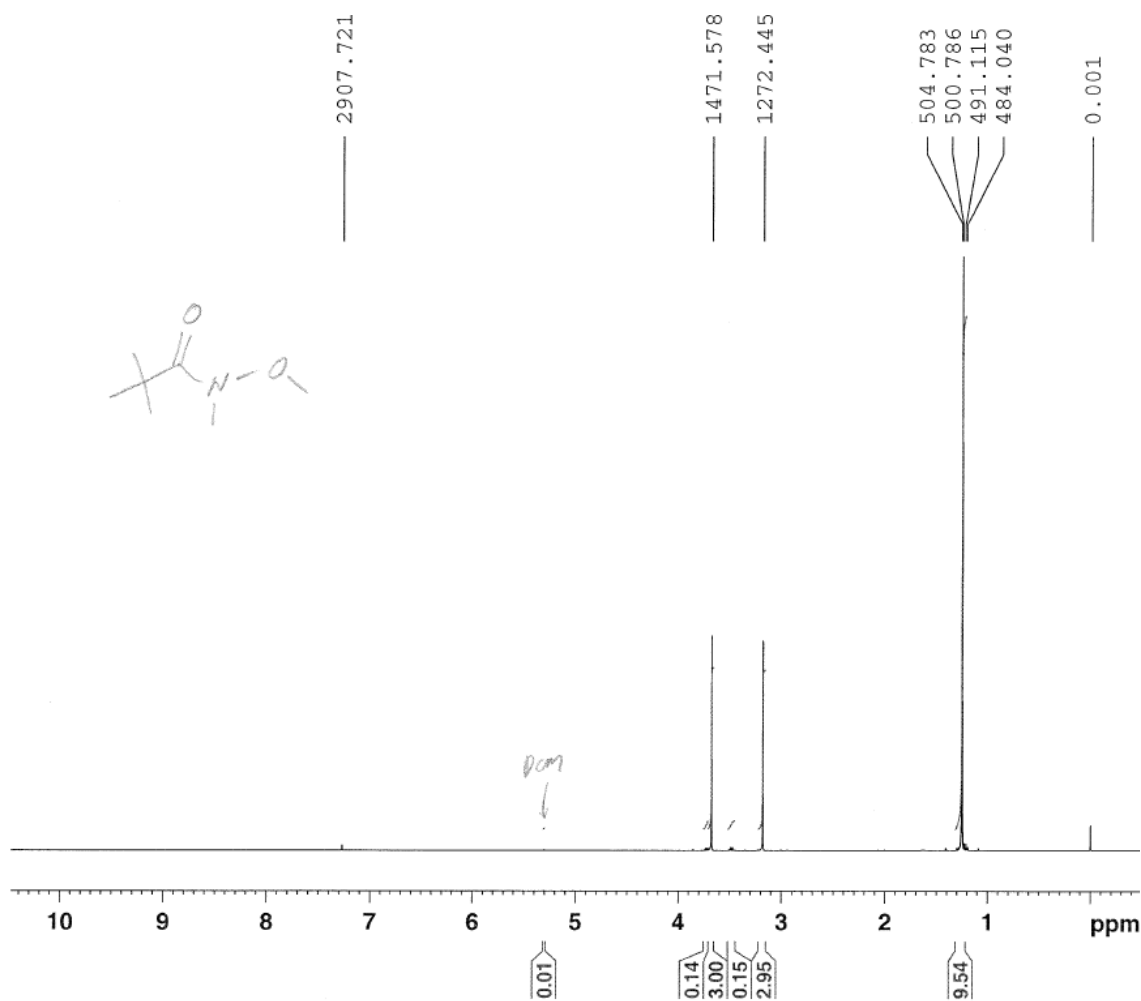

5 Prepared according to J. C. S. Woo, E. Fenster and G. R. Dake, *J. Org. Chem.*, 2004, **69**, 8984.

<sup>1</sup>H NMR for compound **25**

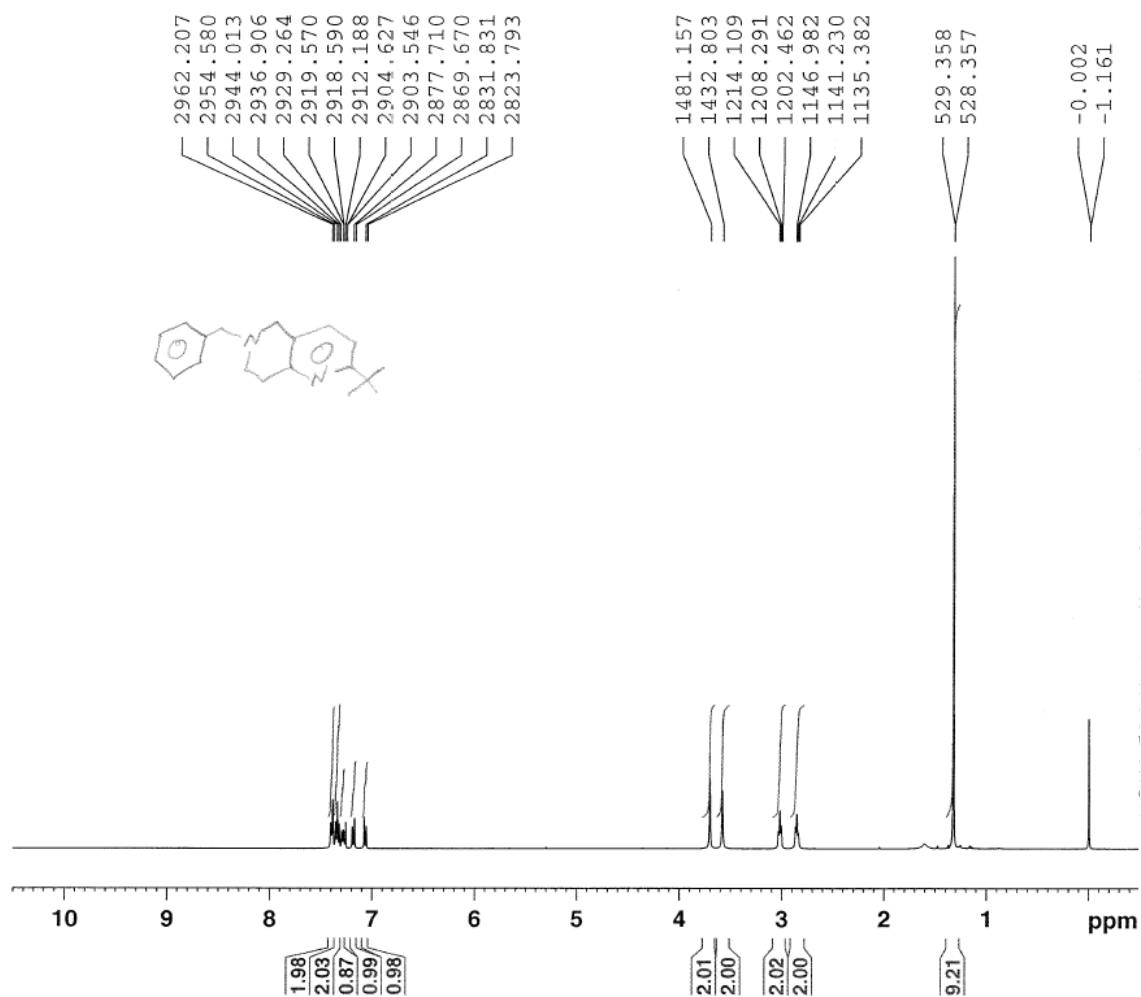

<sup>13</sup>C NMR for compound **25**

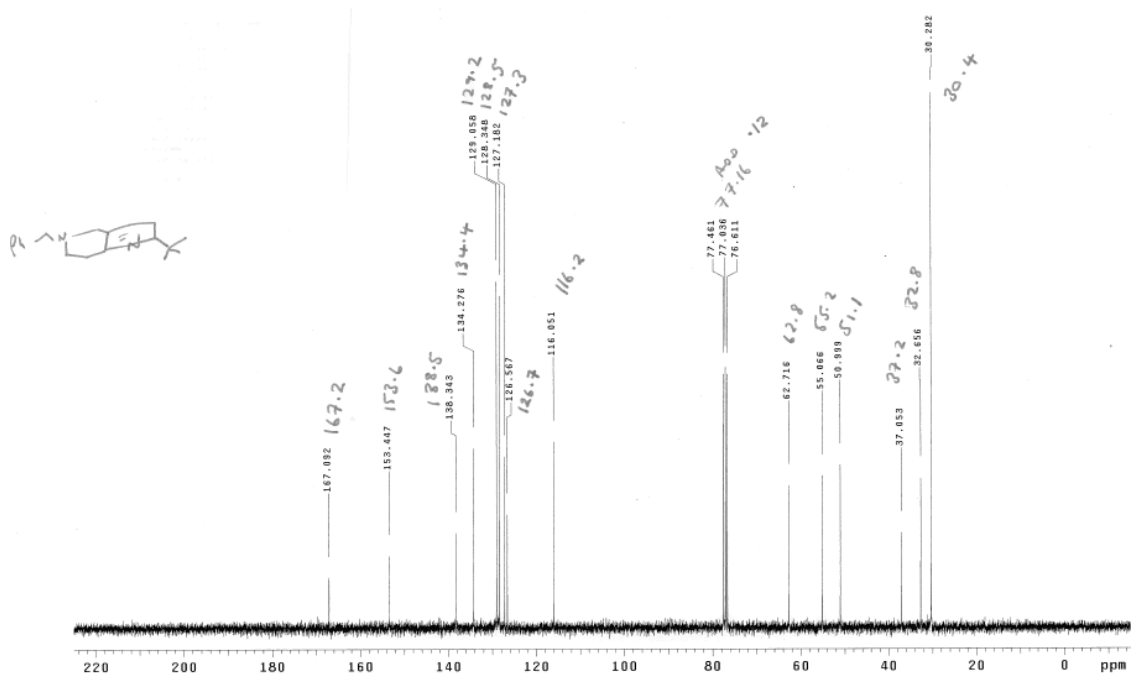

$^1\text{H}$  and  $^{19}\text{F}$  NMR for compound **26**

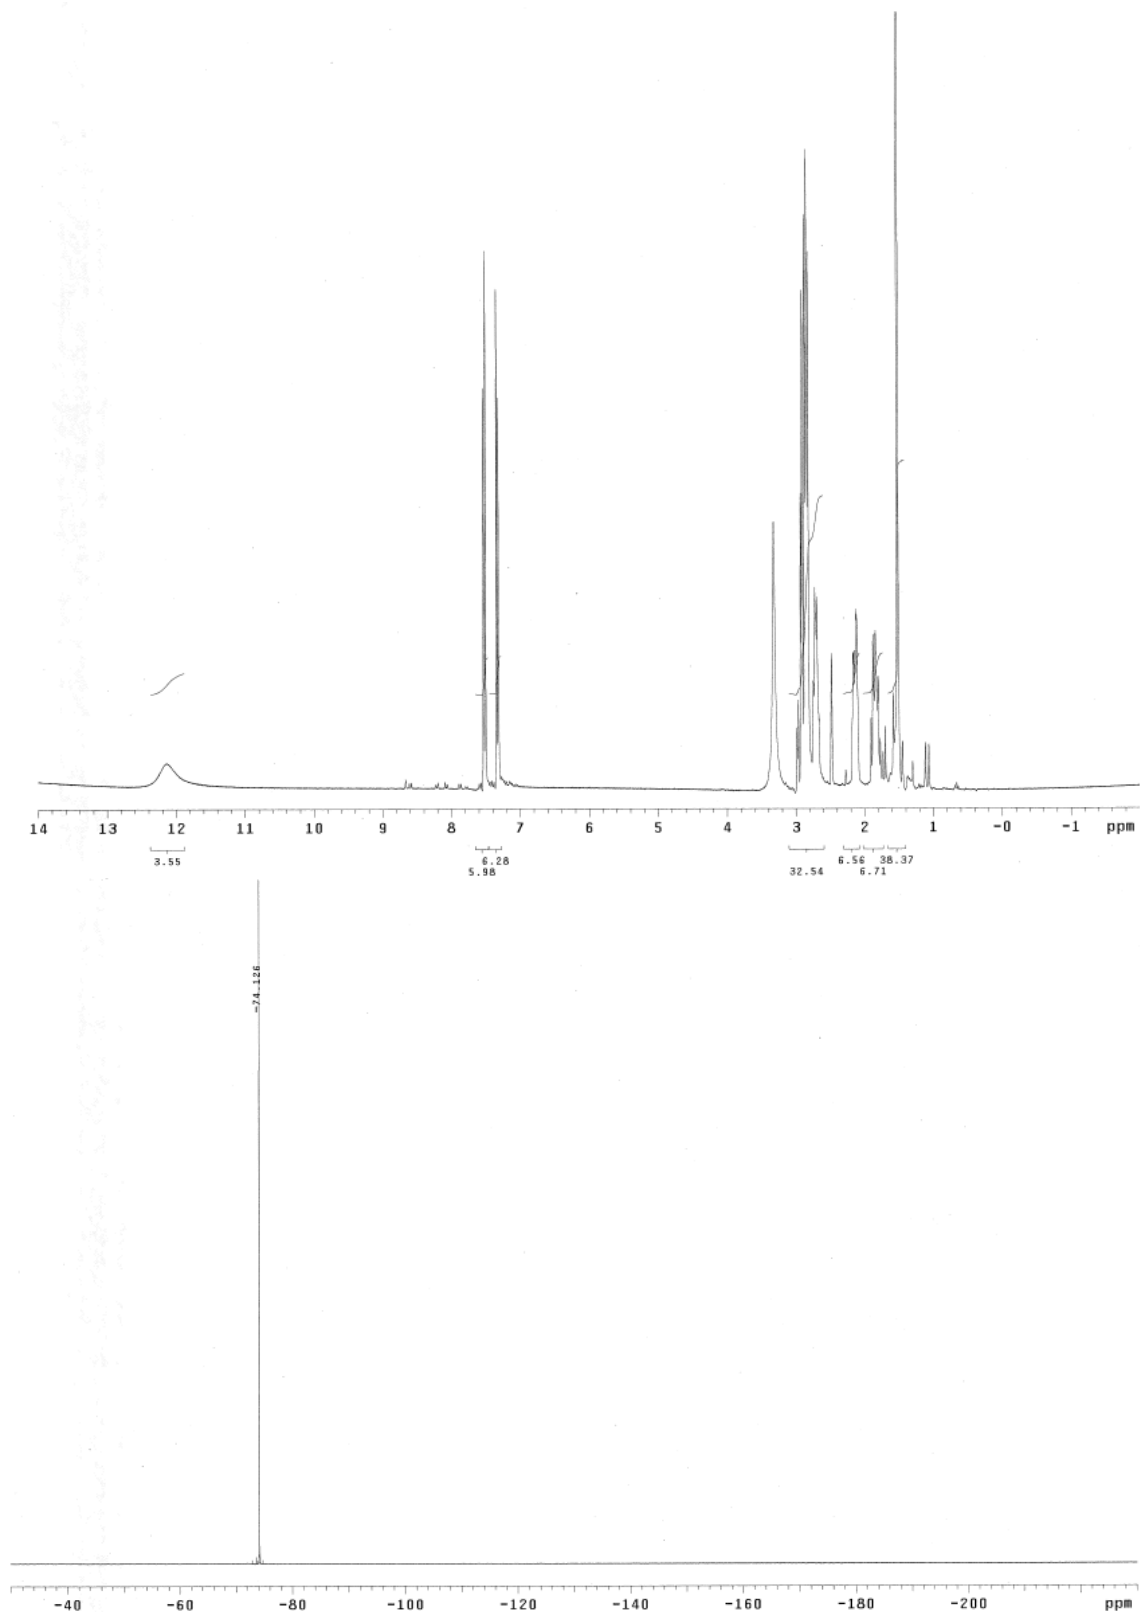

$^{13}\text{C}$  NMR for compound **26**

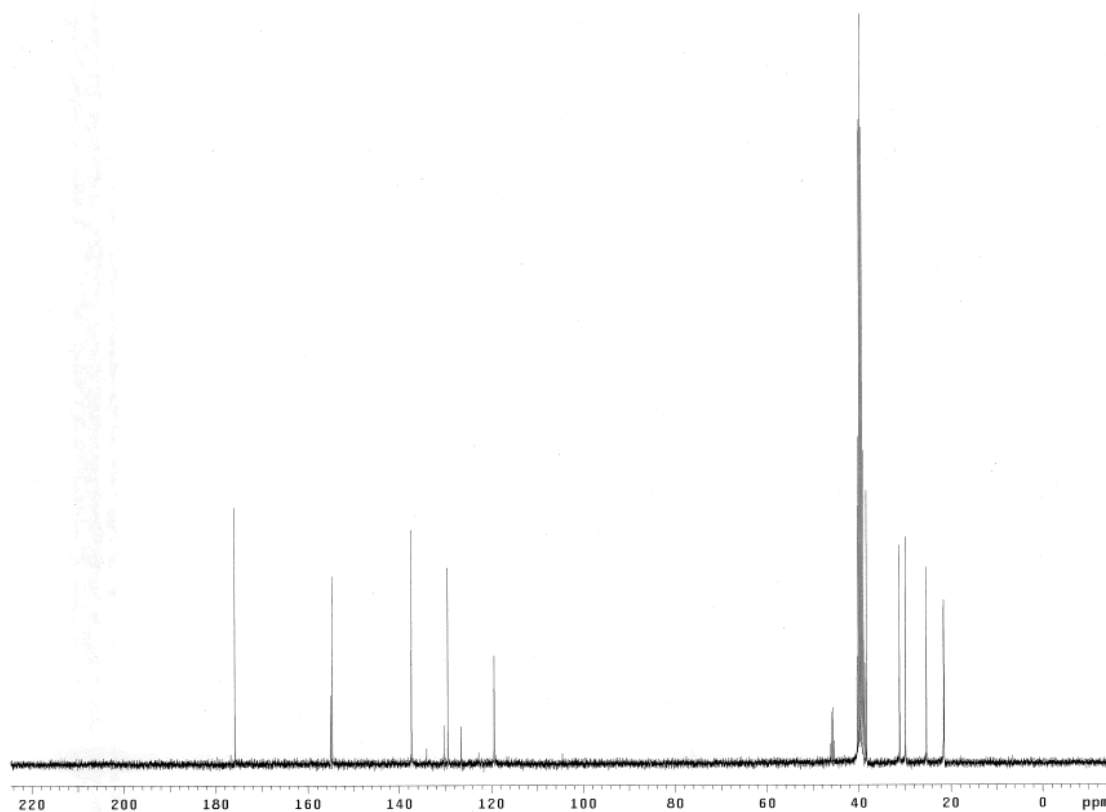



$^1\text{H}$  and  $^{19}\text{F}$  NMR for compound **29**

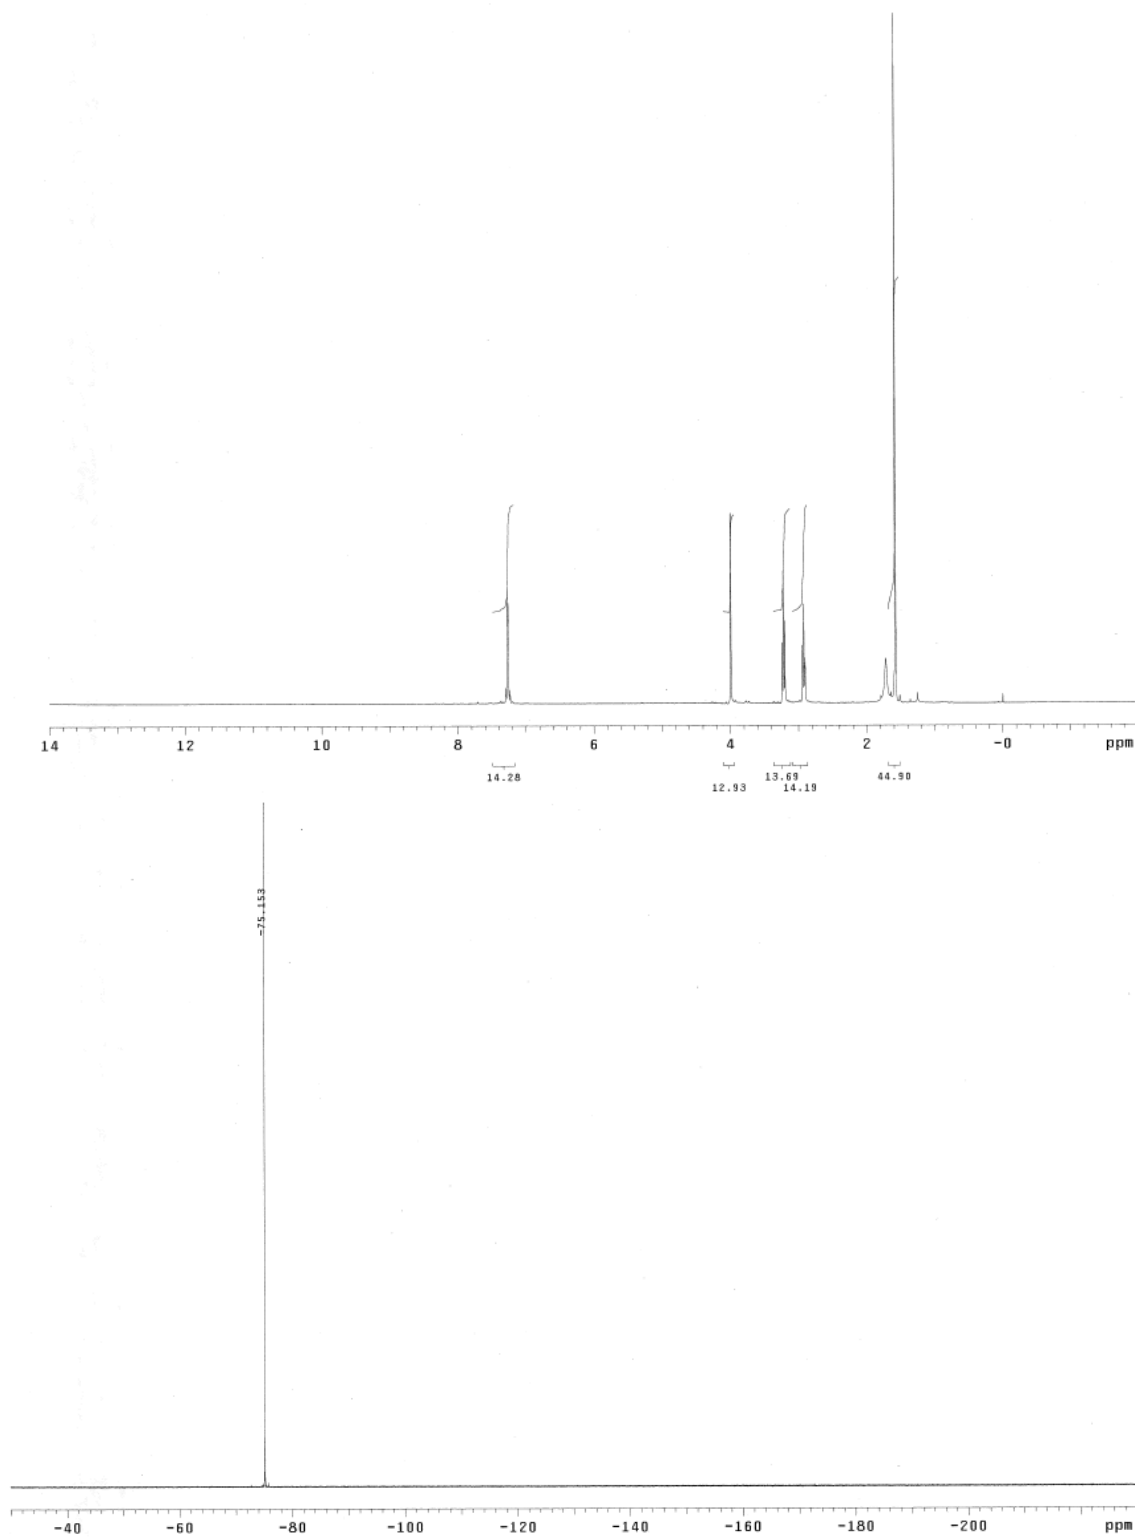

$^{13}\text{C}$  NMR for compound **29**

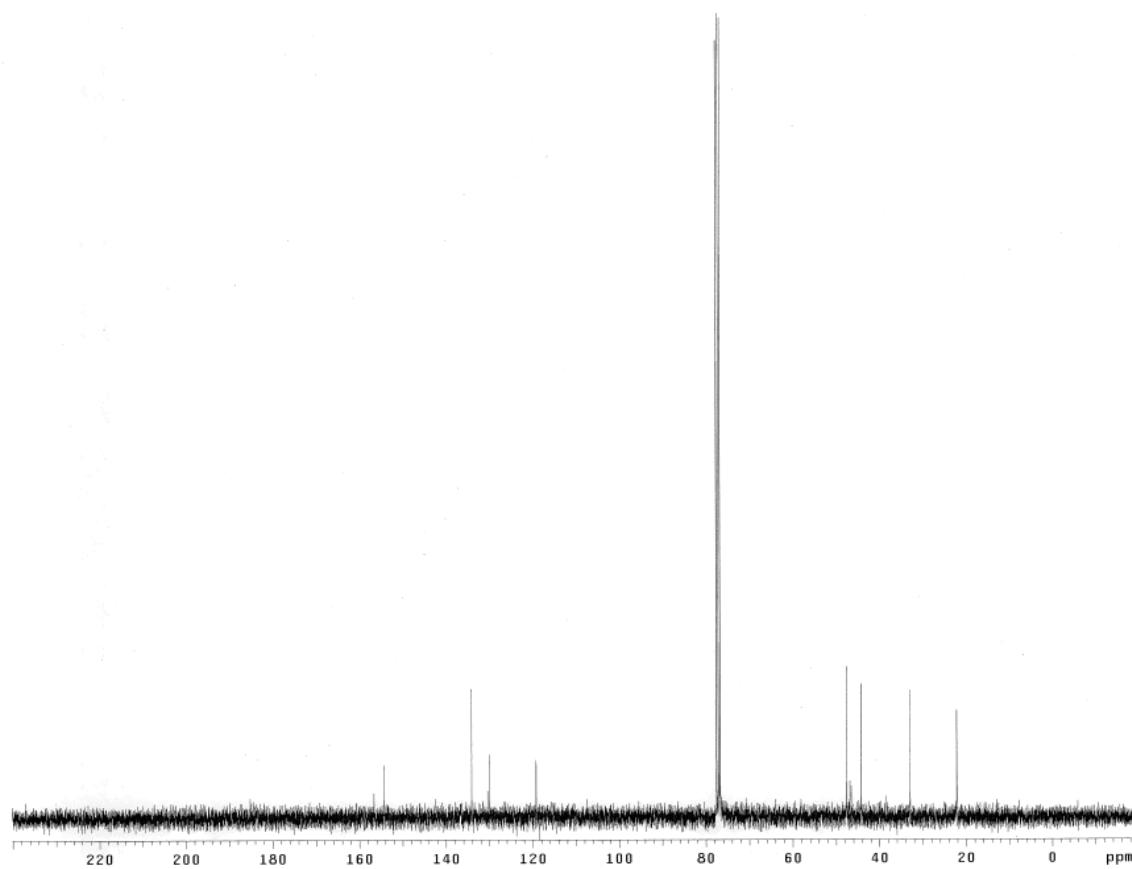

# <sup>1</sup>H NMR for compound **30**<sup>3</sup>

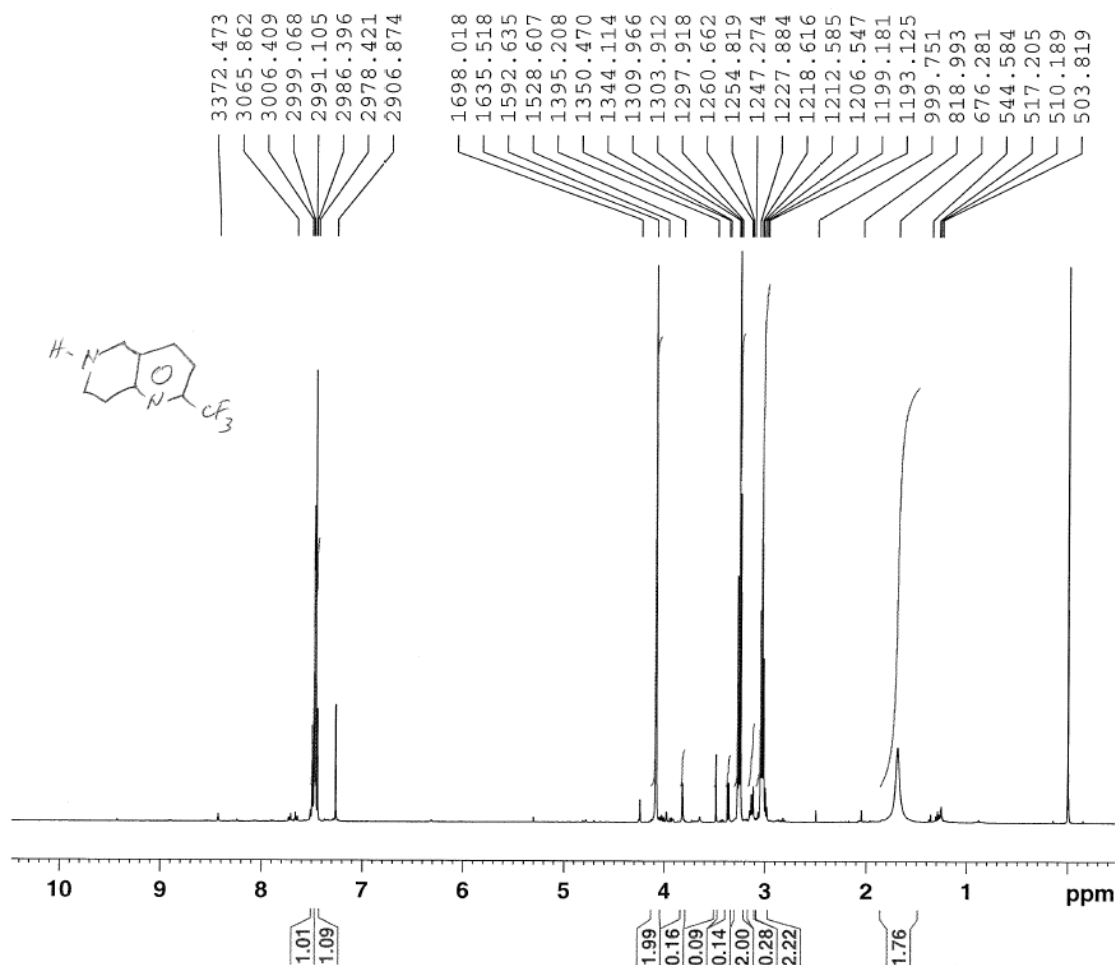

<sup>3</sup> For a related synthesis of 5,6,7,8-tetrahydronaphthyridines, including a synthesis of compounds **20** and **30** see W. T. Ashton, C. G. Caldwell, J. L. Duffy, R. J. Mathvink, L. Wang and A. E. Weber, Patent WO2004064778 (2004); *Chem. Abstr.*, 2004, **141**, p. 174175.
